# Supplementary material for: Genomic characterization of Francisella tularensis and other diverse Francisella species from complex samples
Source: PubMed Central journal article supplement (PMC9555625; doi:10.1371/journal.pone.0273273), 2022-10-12

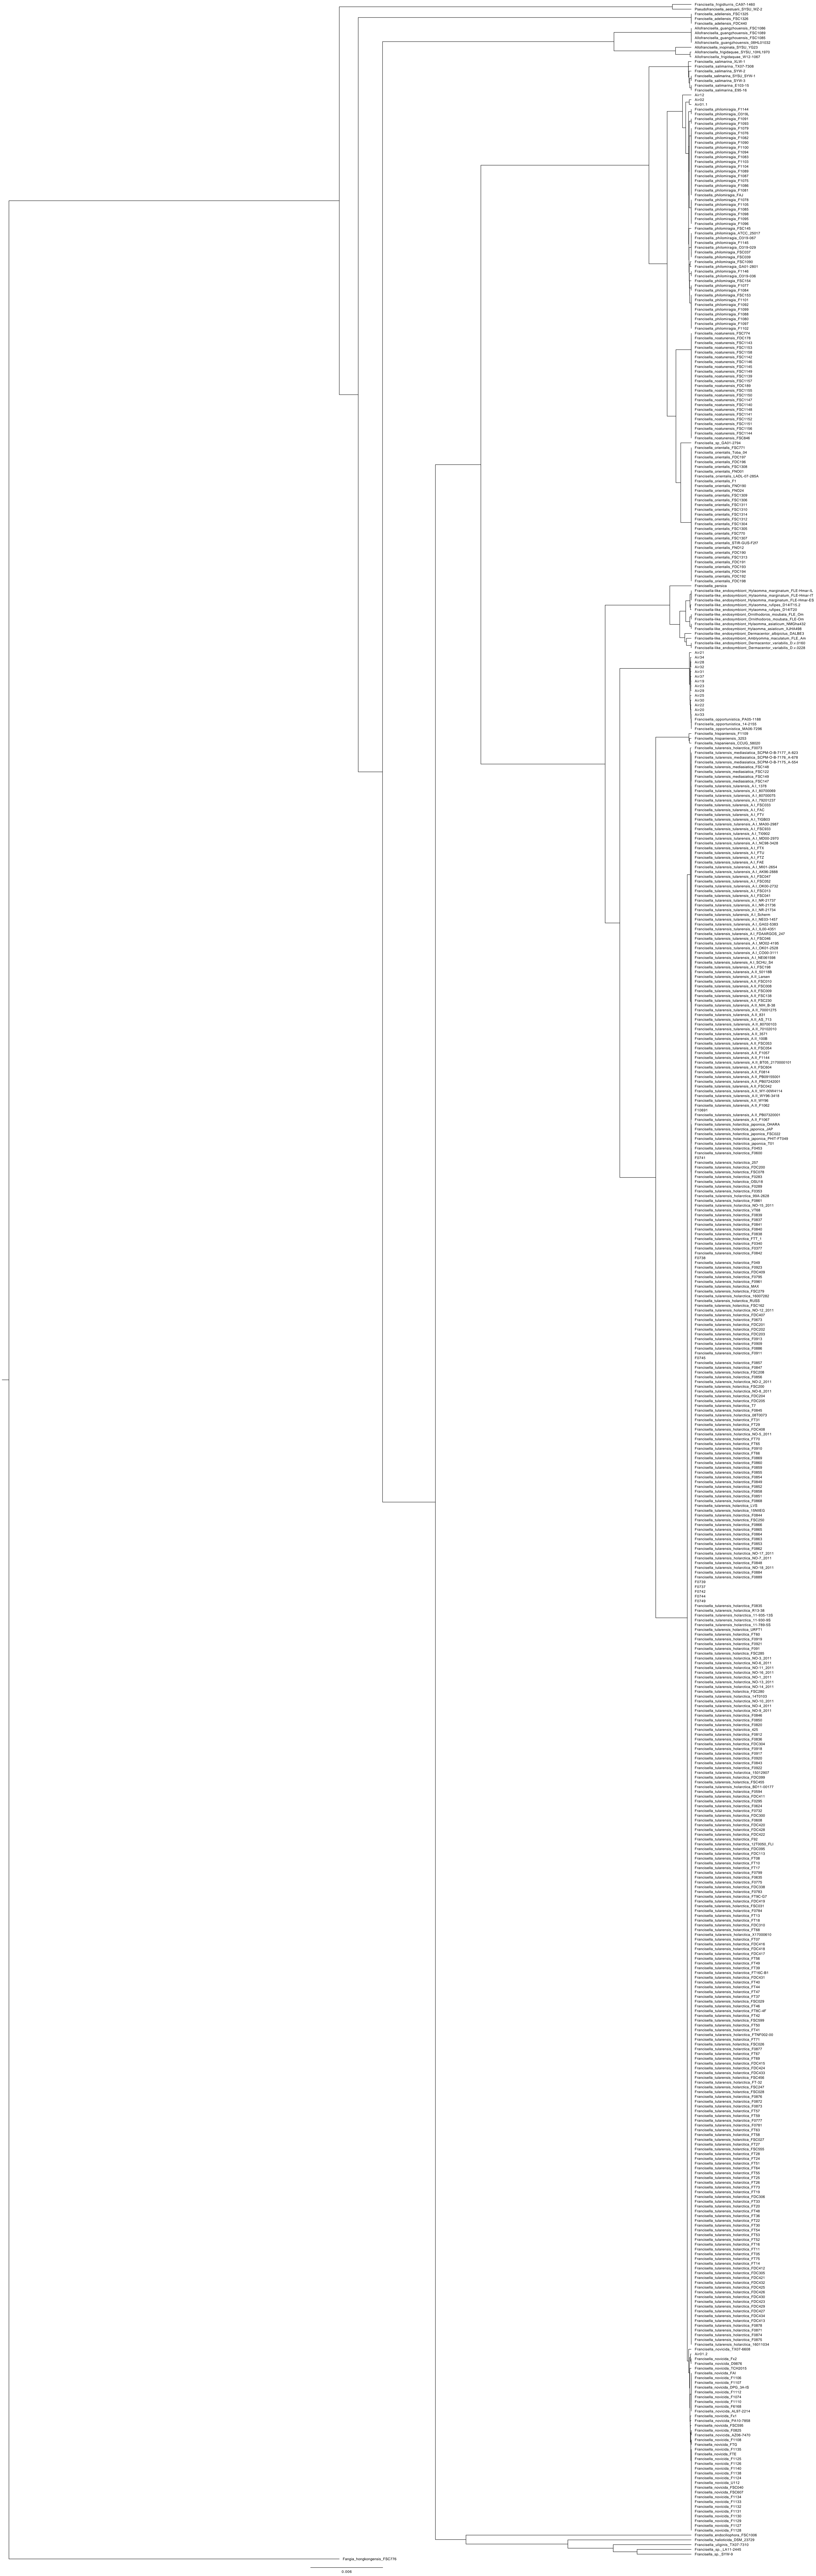

Supplement: pone.0273273.s002.pdf [file pone.0273273.s002.pdf]
